# Supplementary material for: Identify the Early Predictor of Mortality in Patients with Acute Paraquat Poisoning
Source: Hindawi journal article supplement (doi:10.1155/2020/8894180), 2020-01-01
Supplement: f1 [file 8894180.f1.pdf]

**Table s1. Patient characteristics and clinical features of patients with acute paraquat poisoning.**

| Case No.        | Sex    | Age | Time from poisoning to treatment (h) | Toxic dose(ml) | Survival |
|-----------------|--------|-----|--------------------------------------|----------------|----------|
| 1               | Female | 39  | 13                                   | 30ml (20%)     | Dead     |
| 2               | Female | 33  | 7                                    | 20ml           | Dead     |
| 3               | Female | 50  | 11                                   | 50ml           | Dead     |
| 4               | Female | 49  | 16                                   | 50ml           | Dead     |
| 5               | Female | 28  | 96                                   | 40ml           | Dead     |
| 6               | Female | 48  | 7                                    | 20ml           | Dead     |
| 7               | Female | 72  | 15                                   | 100ml (20%)    | Dead     |
| 8               | Female | 68  | 7                                    | 100ml (20%)    | Dead     |
| 9               | Male   | 28  | 6                                    | 60ml           | Dead     |
| 10 <sup>a</sup> | Male   | 20  | 24                                   | UN             | Dead     |
| 11              | Male   | 21  | 4                                    | 50ml           | Dead     |
| 12              | Male   | 64  | 5                                    | 60ml           | Dead     |
| 13              | Male   | 92  | 10                                   | 30ml           | Dead     |
| 14              | Male   | 51  | 7                                    | 50ml           | Dead     |
| 15              | Male   | 30  | 16                                   | 20ml           | Dead     |
| 16 <sup>b</sup> | Female | 56  | 48                                   | UN             | alive    |
| 17              | Female | 24  | 8                                    | 50ml           | alive    |
| 18              | Female | 29  | 5                                    | 10ml           | alive    |
| 19              | Female | 33  | 3                                    | 3ml            | alive    |
| 20              | Female | 49  | 5                                    | 30ml           | alive    |
| 21              | Female | 49  | 72                                   | 30ml           | alive    |
| 22              | Female | 49  | 15                                   | 5ml            | alive    |
| 23              | Female | 52  | 16                                   | 5-10ml         | alive    |
| 24              | Male   | 29  | 5                                    | 7.5ml          | alive    |
| 25 <sup>c</sup> | Male   | 71  | 72                                   | UN             | alive    |
| 26              | Male   | 50  | 5                                    | 20ml           | alive    |
| 27 <sup>d</sup> | Male   | 25  | 96                                   | UN             | alive    |
| 28 <sup>e</sup> | Male   | 14  | 16                                   | UN             | alive    |
| 29              | Male   | 43  | 72                                   | 30ml           | alive    |

<sup>a</sup>: unknown; <sup>b</sup>: Eating vegetables sprayed with Paraquat; <sup>c</sup>: skin contact during spray paraquat; <sup>d</sup>: Oral contact during spray paraquat; <sup>e</sup>: Eating fruit sprayed with Paraquat
